# Supplementary material
Source: PubMed Central journal article supplement (PMC2516257)
Supplement: 0711527105_0711527105SI.pdf [file 0711527105_0711527105SI.pdf]

# Supporting Information

Qi and Portman 10.1073/pnas.0711527105

## SI Text

In this supplement, we include the growth patterns of the folding nuclei for all 27 two-state proteins studied in this article. In following plots, solid lines correspond to folded core, and dashed lines correspond to interface region. Fraction of residues,  $n$ ,

denotes that the number of residues in folded core or interface region was normalized by chain length;  $v$ , is the volume of the core or interface divided by the volume of native state; and  $\mu$  denotes the the packing fraction of the core or interface. Protein PDB ID codes are shown in the second column.
